# Supplementary material
Source: PubMed Central journal article supplement (PMC3023227)
Supplement: supp_00228.2010_figS1.pdf [file supp_00228.2010_figS1.pdf]

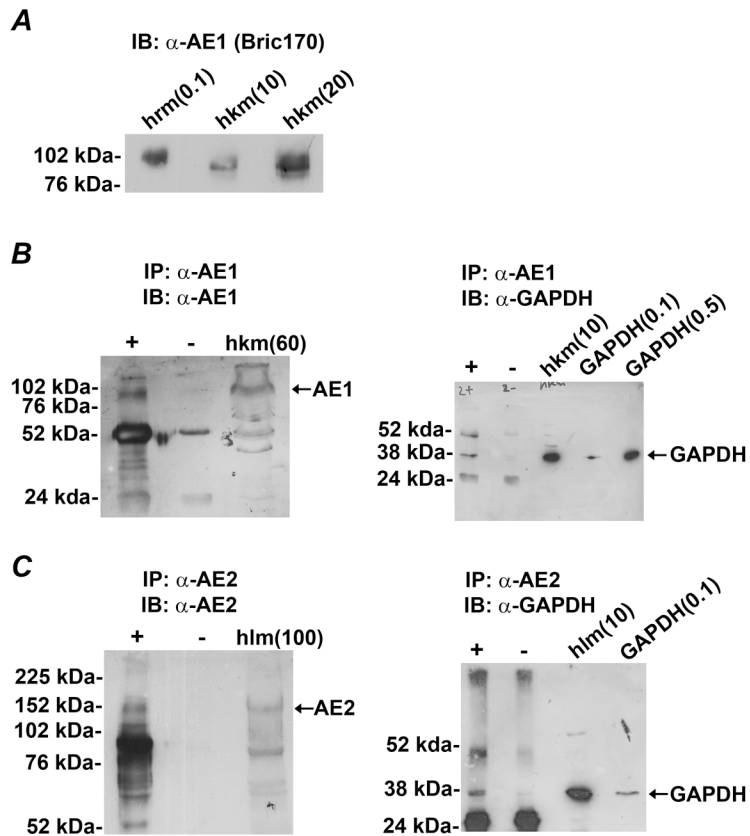

### Su *et. al.* Supplementary Figure 1

(A), Western blot analysis of human erythrocyte and kidney membranes using Bric170, a mouse monoclonal  $\alpha$ -AE1 antibody, showed no detectable eAE1 in the kidney samples used in this study. (B) and (C), Co-immunoprecipitation assays. As described in the Methods, solubilized membrane protein fractions of fresh frozen human kidney (B) and liver (C) were immunoprecipitated using rabbit polyclonal  $\alpha$ -AE1 and goat polyclonal  $\alpha$ -AE2 antibodies, respectively (+ lanes). Detection of GAPDH (approx. 36 kDa) by mouse monoclonal  $\alpha$ -GAPDH antibody indicates co-immunoprecipitation in both species (right panels). Input GAPDH was from Sigma. Probing with the precipitating antibodies confirmed the presence of AE1 (B, left panel) or AE2 (C, left panel) in the relevant precipitated complex. Data for co-immunoprecipitation of GAPDH and AE1 in rat kidney are of similar quality, but not shown. - lanes indicate omission of  $\alpha$ -AE1 or  $\alpha$ -AE2 antibody. Numbers in brackets indicate amounts ( $\mu$ g) of input samples loaded. IP, immunoprecipitation; IB, immunoblot; hkm/hlm, input human kidney/liver membrane protein. (B) and (C), major bands in '+' lanes are likely heavy chain monomer/dimer.
