# Supplementary material
Source: PubMed Central journal article supplement (PMC3023227)
Supplement: supp_00228.2010_figS2.pdf [file supp_00228.2010_figS2.pdf]

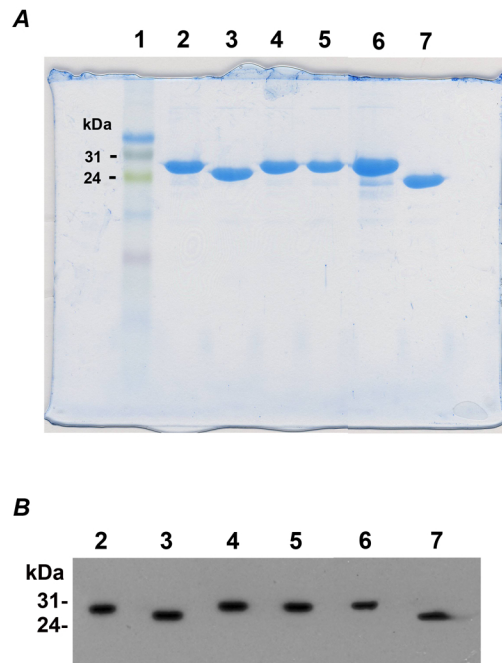

**Su et. al. Supplementary Figure 2**

Analysis of GST-tagged WT or mutant AE1C fusion proteins. Each fusion protein was expressed in *E. coli* BL21 cells, purified and subjected to SDS-PAGE (A) and Western blot analysis using anti-GST antibody (B). Lanes: 1, Rainbow Molecular Weight Markers (Amersham Biosciences); 2, GST\_AE1C-WT; 3, GST\_AE1C- $\Delta$ 11; 4, GST\_AE1C-AA1; 5, GST\_AE1C-YA; 6, GST\_AE1C-AA2; 7, GST.
