# Supplementary material
Source: PubMed Central journal article supplement (PMC3023227)
Supplement: supp_00228.2010_figS4.pdf [file supp_00228.2010_figS4.pdf]

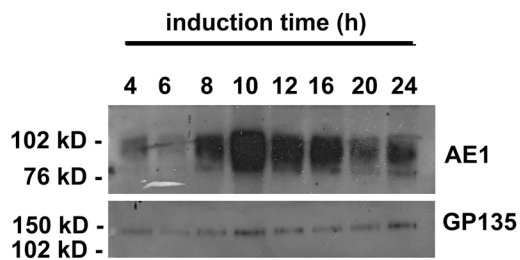

#### Su et. al. Supplementary Figure 4

Stably transfected MDCK cells expressing eGFP-kAE1 were seeded on Transwell filters and grown for 4 days. kAE1 expression was induced for 4, 6, 8, 10, 12, 16, 20, or 24 h. Cell surface proteins were isolated by biotinylation, then separated by SDS-PAGE followed by Western blot analysis of the same blot using anti-AE1 (Bric170) or anti-GP135 as described in 'Methods'. Steady state surface expression of eGFP-kAE1 (confirmed by densitometry) was observed at 12 and 16 h.
